# Supplementary material for: Refined Time‐Domain Buffeting Analysis of a Long‐Span Suspension Bridge in Mountainous Urban Terrain
Source: Hindawi journal article supplement (doi:10.1155/2020/4703169), 2020-01-01
Supplement: f1 [file 4703169.f1.docx]

## Supplementary A. More Details of the Wind Field Characteristics

### A.1. Cross validations of the two types of anemometer

Figure. A1. The monthly maximum wind speed at P6 in the year of 2015.

The cross-validation between the cup anemometer and the ultrasonic anemometers are conducted by comparing the maximum wind speed per month in the year of 2015. The results are shown in Figure. A1, which indicates the good agreements between the two anemometers.

### A.2. Wind direction

The wind rose diagram which depicts the probability distribution of wind directions is shown in Figure. A2. Results show that the main wind direction is north northwest (NNW) with the frequency of 0.205 and the south-southeast wind (SSE) with the frequency value of 0.101 sequentially.

Figure. A2. Wind rose diagram at P6.

### A.3. Wind angle of attack

There are 19 strong wind events measured during the measuring period. Take the one on Oct.15th, 2014, the time histories of the wind attack angle and wind speed in a 10-min recording are shown in Fig. A3. Meanwhile, the wind attack angles and wind speeds are averaged per 10-min interval and plotted in Figure. A4 for a 24 h period.

Figure. A3. The instantaneous wind attack angle (a) and wind speed (b) on 03:05~03:15, Oct.15th, 2014.

Figure. A4. The 10-min averaged wind attack angle and wind speed on Oct.15th, 2014.

### A.4. Wind profile of the strong wind data

The mean wind speed profile is introduced to describe the distribution of wind speed along the height above ground, which follows the exponential model (see Eq.1). The curves are fitted based on the mean wind speed of P1-P9 during the 19 strong wind events. The average of the fitted index is β=0.166. Several typical curves are shown in Figure. A5.

## Supplementary B. The aerodynamic forces coefficients (AFC)

The stationary drag, lift and moment coefficients of all the cases are given and compared in Figure. A6. Comparing Case 1 with Case 0, the drag coefficients CD are increased; the lift coefficients CL are increased when AoA is in the range -12°~+5° while CL is decreased when AoA is in the range +5°~+12°; the moment coefficients CM are slightly increased only in the large AoAs. Comparing Case 2 with Case 1, CD is decreased while CL is increased; and CM is slightly increased only in the large AoAs. Comparing Case 3 with Case 1, CD is decreased when AoA is in the range -7°~+7°; CL and CM are slightly decreased when AoA is in the range -9°~+9° while increased when AoA is in the range -12°~-9°. Comparing Case 4 with Case 1, CD is increased when AoA is in the range -12°~‒8° while decreased when AoA is in the range -7°~+12°; CL and CM are slightly increased when AoA is in the range -12°~-8° while decreased when AoA is in the range ‒7°~+12°.

Figure. A5. The measured and fitted curves for the wind profile during several strong wind events

Figure. A6. Experimentally tested aerostatic forces coefficients (AFCs) for all cases: (a) CL; (b) CD; (c) CM.

## Supplementary C. The aerodynamic admittance functions (AAF)

The aerodynamic admittances of all the cases at 0° AoA are shown in Figure. A7. It should be noted that the following comparisons are conducted from an overall remark.

The influences of the subsidiary structures can be determined by comparing the results of Case 1 and Case 0. Results show that the AAFs of Case 1 are smaller than those of Case 0. The influences of the ventilation rate of pedestrian guardrails are determined by comparing the results of Case 2 and Case 1. Results show that the AAFs are slightly decreased and can be neglected. The effects of moving the inspection rails inward are conducted by comparing the results of Case 3 and Case 1. It is shown that the AAFs, especially |χM|2,are increased. Finally, the influences of girder surface roughness are determined by comparing the results of Case 4 and Case 0. Results show that the lift admittance |χL|2 is little changed while |χD|2 and |χM|2 are increased.

To make it clearer, a summary of the above discussions are given in Table. A1.

Table. A1. Summary of the influence of several factors on the AAF

| Influence factors | Configuration changes | Any significant changes? | | |
| --- | --- | --- | --- | --- |
| |χL|2 | |χD|2 | |χM|2 |
| All subsidiary structures | Case 0→Case 1 | Yes | Yes | Yes |
| The ventilation rate of pedestrian guardrail | Case 1→Case 2 | No | No | No |
| Location of inspection rail | Case 1→Case 3 | Yes | Yes | Yes |
| Girder surface roughness | Case 1→Case 4 | No | Yes | Yes |

Figure. A7. The AAF of drag (left column), lift (middle column) and moment (right column) of all cases at 0° AoA.
